# Supplementary material for: Crystal structures and magnetic properties of one-dimensional compounds constructed from Mn2(salen)2 building blocks and organic selenite acid ligands
Source: Royal Society of Chemistry journal article supplement (doi:10.1039/d1nj03338g), 2021-01-01
Supplement: d1nj03338g1.pdf [file d1nj03338g1.pdf]

Electronic Supplementary Material (ESI)

This journal is © The Royal Society of Chemistry 2021

**Crystal structures and magnetic properties of one dimensional compounds constructed from  $Mn_2(salen)_2$  building block and organic selenite acid ligands**

Shao-Liang Zhang\*<sup>a</sup>, Xin-Chao Li<sup>a</sup>, Shi-Yu Gu<sup>a</sup>, Shi Guo<sup>a</sup>, Zi-Yu Liu<sup>a</sup>, Su-Yuan Zeng<sup>a</sup>, Shan-Shan Li<sup>b</sup>

<sup>a</sup>*Institution of Functional Organic Molecules and Materials, School of Chemistry and Chemical Engineering, Liaocheng University, Liaocheng, 252059, China*

<sup>b</sup>*School of Geography and Environment, Liaocheng University, Liaocheng, 252059, China*

E-mail: [zhangshaoliang05@163.com](mailto:zhangshaoliang05@163.com), [zhangshaoliang@lcu.edu.cn](mailto:zhangshaoliang@lcu.edu.cn)

Supporting Information

**Table S1.** Selected bond lengths [Å] and angles [°] for complex **1**.

| Complex 1         |            |                   |           |
|-------------------|------------|-------------------|-----------|
| Mn(1)-O(3)        | 1.876(4)   | Mn(2)-O(6)        | 1.879(4)  |
| Mn(1)-O(4)        | 1.905(4)   | Mn(2)-O(5)        | 1.866(4)  |
| Mn(1)-N(1)        | 1.982(5)   | Mn(2)-N(4)        | 1.989(5)  |
| Mn(1)-N(2)        | 1.995(5)   | Mn(2)-N(3)        | 1.973(5)  |
| Mn(1)-O(1)        | 2.082(4)   | Mn(2)-O(2)        | 2.064(4)  |
| Mn(1)-O(4)#1      | 2.498(4)   | Mn(2)-O(6)#2      | 2.922(4)  |
| Se(1)-O(1)        | 1.681(4)   | Se(1)-O(2)        | 1.681(4)  |
| O(3)-Mn(1)-O(4)   | 95.52(18)  | O(6)-Mn(2)-O(5)   | 92.78(18) |
| O(3)-Mn(1)-N(1)   | 91.8(2)    | O(6)-Mn(2)-N(4)   | 89.7(2)   |
| O(4)-Mn(1)-N(1)   | 165.8(2)   | O(5)-Mn(2)-N(4)   | 162.4(2)  |
| O(3)-Mn(1)-N(2)   | 172.6(2)   | O(6)-Mn(2)-N(3)   | 165.0(2)  |
| O(4)-Mn(1)-N(2)   | 89.7(2)    | O(5)-Mn(2)-N(3)   | 91.9(2)   |
| N(1)-Mn(1)-N(2)   | 82.1(2)    | N(4)-Mn(2)-N(3)   | 81.7(2)   |
| O(3)-Mn(1)-O(1)   | 96.56(19)  | O(6)-Mn(2)-O(2)   | 96.58(19) |
| O(4)-Mn(1)-O(1)   | 94.88(18)  | O(5)-Mn(2)-O(2)   | 97.5(2)   |
| N(1)-Mn(1)-O(1)   | 96.4(2)    | N(4)-Mn(2)-O(2)   | 99.5(2)   |
| N(2)-Mn(1)-O(1)   | 88.2(2)    | N(3)-Mn(2)-O(2)   | 96.9(2)   |
| O(1)-Mn(1)-O(4)#1 | 172.74(16) | O(2)-Mn(2)-O(6)#2 | 178.74(6) |

Symmetry code for complex **1**: -x, 2-y, 1-z; #2: -x, -y, -z

**Table S2.** Selected bond lengths [Å] and angles [°] for complex **2**.

| Complex <b>2</b>  |           |                   |            |
|-------------------|-----------|-------------------|------------|
| Mn(1)-O(3)        | 1.891(4)  | Mn(2)-O(6)        | 1.873(4)   |
| Mn(1)-O(4)        | 1.882(4)  | Mn(2)-O(5)        | 1.910(4)   |
| Mn(1)-N(1)        | 1.987(5)  | Mn(2)-N(4)        | 1.976(5)   |
| Mn(1)-N(2)        | 1.969(5)  | Mn(2)-N(3)        | 1.997(5)   |
| Mn(1)-O(1)        | 2.094(4)  | Mn(2)-O(2)        | 2.095(4)   |
| Mn(1)-O(3)#1      | 2.631(2)  | Mn(2)-O(5)#2      | 2.523(2)   |
| Se(1)-O(1)        | 1.711(3)  | Se(1)-O(2)        | 1.689(4)   |
| O(3)-Mn(1)-O(4)   | 95.07(18) | O(6)-Mn(2)-O(5)   | 95.32(18)  |
| O(3)-Mn(1)-N(1)   | 89.3(2)   | O(6)-Mn(2)-N(4)   | 91.9(2)    |
| O(4)-Mn(1)-N(1)   | 169.2(2)  | O(5)-Mn(2)-N(4)   | 165.98(19) |
| O(3)-Mn(1)-N(2)   | 165.6(2)  | O(6)-Mn(2)-N(3)   | 170.3(2)   |
| O(4)-Mn(1)-N(2)   | 91.3(2)   | O(5)-Mn(2)-N(3)   | 89.53(19)  |
| N(1)-Mn(1)-N(2)   | 82.3(2)   | N(4)-Mn(2)-N(3)   | 81.7(2)    |
| O(3)-Mn(1)-O(1)   | 95.91(17) | O(6)-Mn(2)-O(2)   | 96.62(18)  |
| O(4)-Mn(1)-O(1)   | 95.72(17) | O(5)-Mn(2)-O(2)   | 95.76(17)  |
| N(1)-Mn(1)-O(1)   | 93.59(18) | N(4)-Mn(2)-O(2)   | 95.33(18)  |
| N(2)-Mn(1)-O(1)   | 96.32(19) | N(3)-Mn(2)-O(2)   | 91.24(18)  |
| O(1)-Mn(1)-O(3)#1 | 174.9(8)  | O(2)-Mn(2)-O(5)#2 | 172.42(7)  |

Symmetry code for complex **2**: 1-x, -y, -z; #2: 2-x, 1-y, -z

**Table S3** The parameters obtained by fitting Cole-Cole plot for **1**.

| T / K | $\chi_s$ | $\chi_T$ | $\tau$   | $a$  |
|-------|----------|----------|----------|------|
| 2.0   | 0.155    | 0.598    | 0.012264 | 0.14 |
| 2.2   | 0.162    | 0.662    | 0.002719 | 0.13 |
| 2.4   | 0.177    | 0.754    | 0.000710 | 0.11 |
| 2.6   | 0.211    | 0.887    | 0.000223 | 0.08 |
| 2.8   | 0.226    | 1.085    | 0.000077 | 0.05 |
| 3.0   | 0.000    | 1.386    | 0.000023 | 0.04 |

**Table S4** The parameters obtained by fitting Cole-Cole plot for **2**.

| T / K | $\chi_{S,tot}$ | $\Delta\chi_1$ | $\tau_1$  | $a_1$    | $\Delta\chi_2$ | $\tau_2$  | $a_2$ |
|-------|----------------|----------------|-----------|----------|----------------|-----------|-------|
| 2.0   | 0.0092         | 0.174          | 0.0000053 | 0.08     | 0.0248         | 0.0143680 | 0.29  |
| 2.2   | 0.0197         | 0.175          | 0.0000071 | $\sim 0$ | 0.0364         | 0.0051491 | 0.27  |
| 2.4   | 0.0002         | 0.174          | 0.0000048 | $\sim 0$ | 0.0213         | 0.0013606 | 0.41  |
| 2.6   | 0.0001         | 0.155          | 0.0000055 | $\sim 0$ | 0.0463         | 0.0000363 | 0.66  |
| 2.8   | $\sim 0$       | 0.145          | 0.0000091 | $\sim 0$ | 0.0678         | 0.0000003 | 0.83  |
| 3.0   | $\sim 0$       | 0.161          | 0.0000076 | $\sim 0$ | 0.0707         | 0.0000005 | 0.91  |

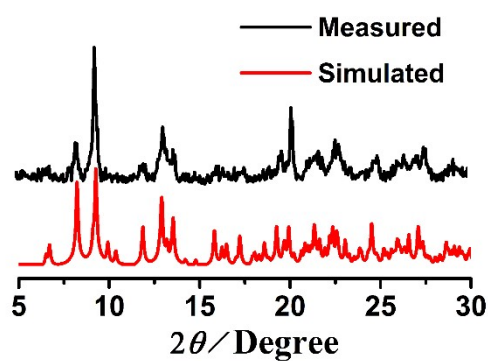

**Figure S1.** The powder XRD pattern of **1** in black and its simulation in red.

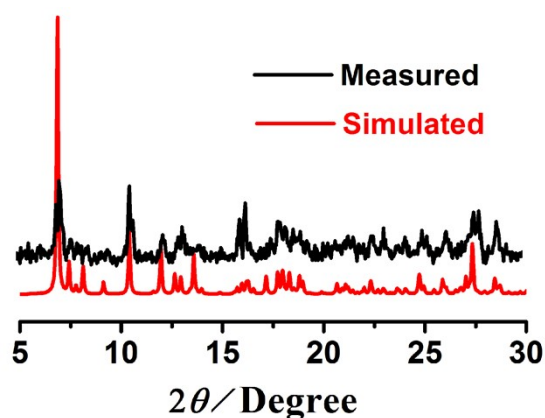

**Figure S2.** The powder XRD pattern of **2** in black and its simulation in red.

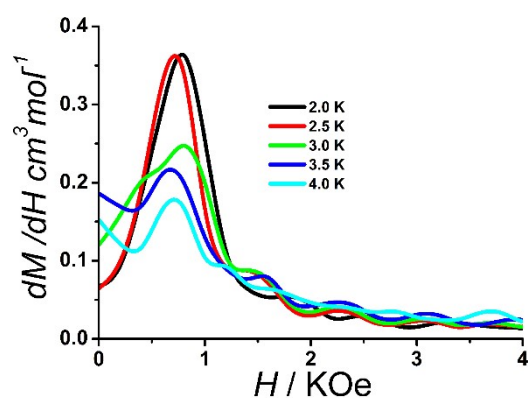

**Figure S3.** The derivative of field-dependent magnetization of **1** measured at different temperatures.

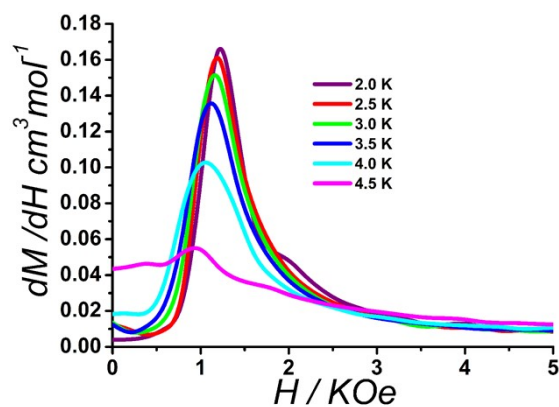

**Figure S4.** The derivative of field-dependent magnetization of **2** measured at different temperatures.

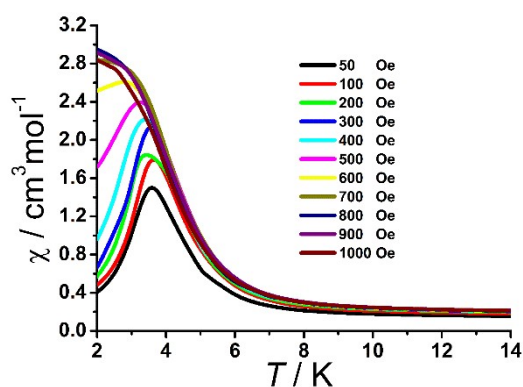

**Figure S5** The  $\chi_M$  versus  $T$  plots measured at different external fields of **1**.

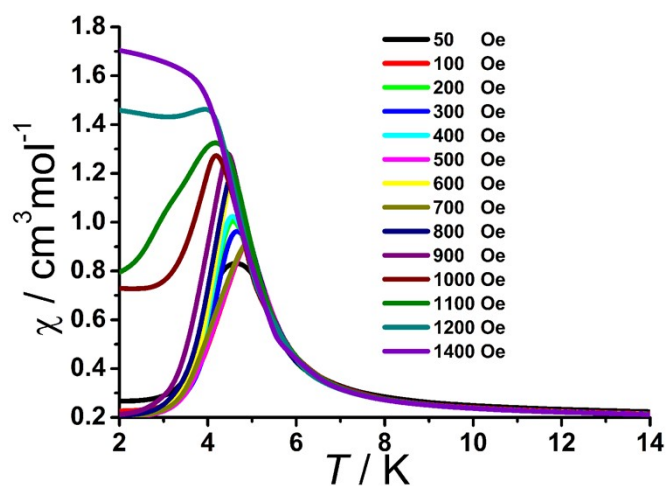

**Figure S6** The  $\chi_M$  versus  $T$  plots measured at different external fields of **2**.

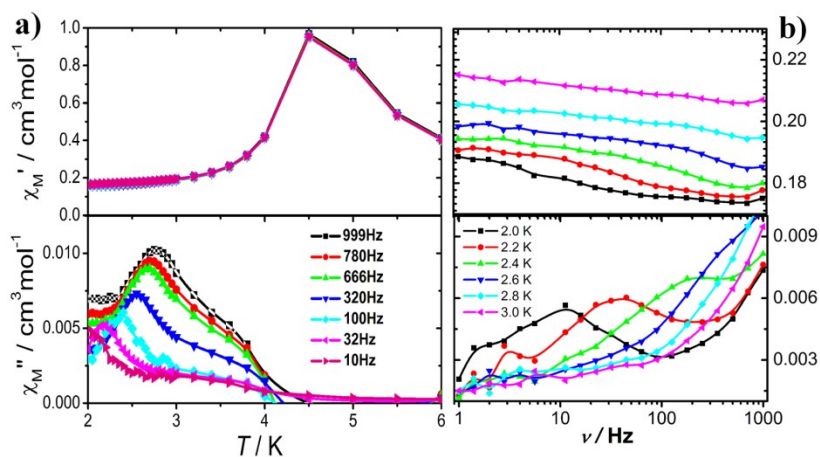

**Figure S7.** Variable-temperature (a) and variable-frequency (b) *ac* magnetic susceptibility data of **2** under  $H_{ac} = 2$  Oe and  $H_{dc} = 0$  Oe.

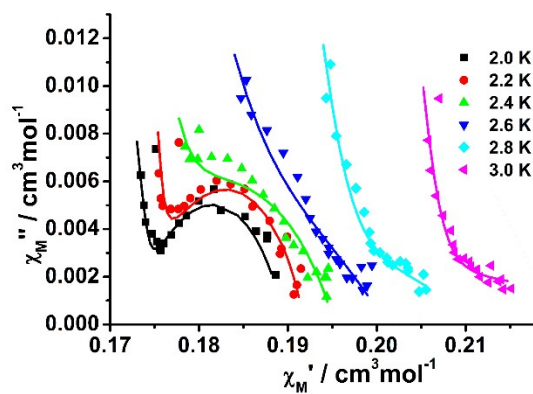

**Figure S8.** Cole–Cole plots of the compound **2** from 2.0 to 3.0 K. The solid lines represent the fitting using the generalized Debye model

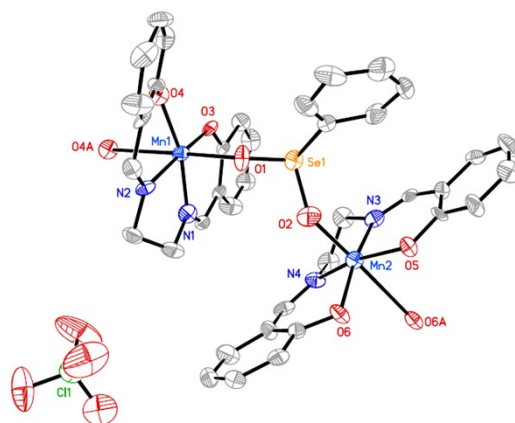

**Figure S9** The asymmetric unit of complex **1**, rendered with 30% probability ellipsoids. Hydrogen atoms are omitted for clarity.

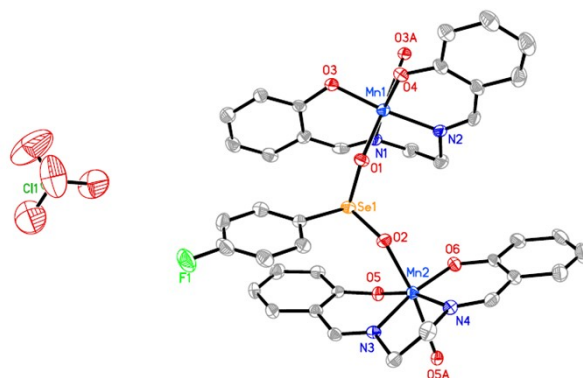

**Figure S10** The asymmetric unit of complex **2**, rendered with 30% probability ellipsoids. Hydrogen atoms are omitted for clarity.
